# Supplementary material for: Genome-Wide Identification and Expression Analysis of the UGlcAE Gene Family in Tomato
Source: PubMed Central journal article supplement (PMC6032376; doi:10.3390/ijms19061583), 2018-05-27

Figure S1 The predicted transmembrane domains of nine SIUGlcAE proteins

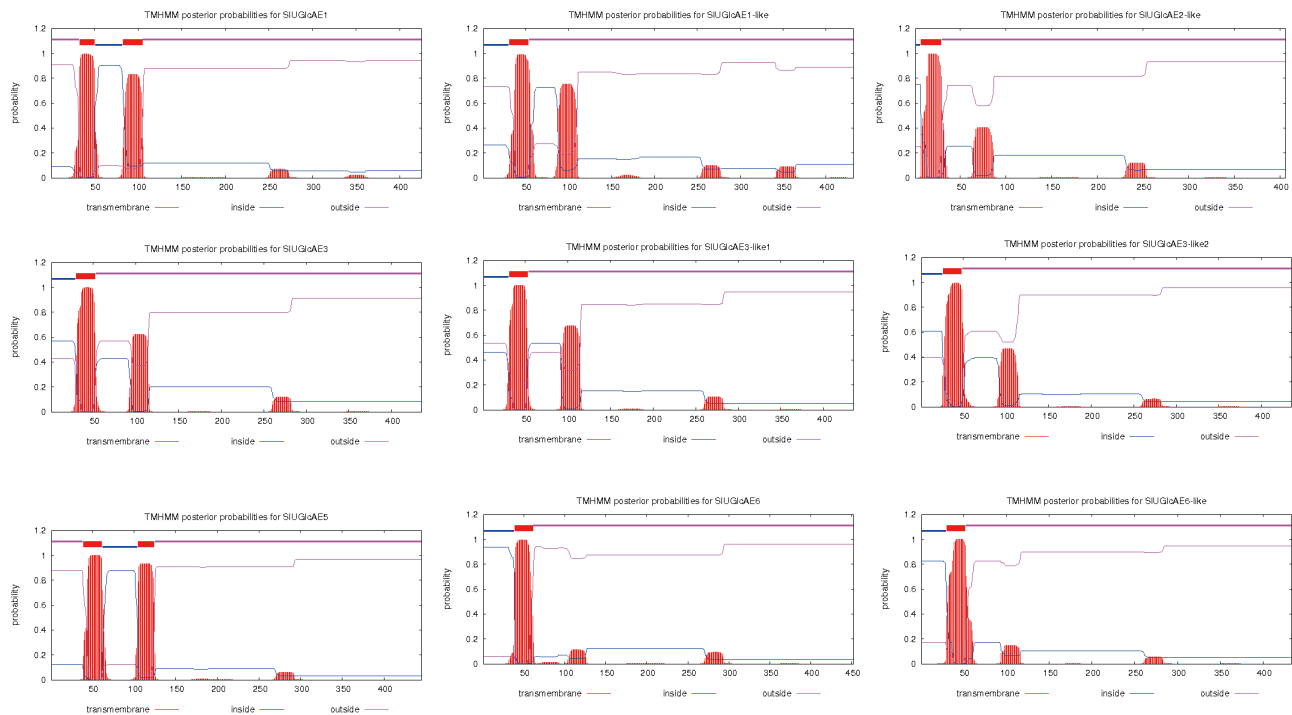

## Selecton Results

```

1           11           21           31           41
MPSLEEEELFP STPGKFKDRN RHFHRCFAST SNMFLWALFL IALTASYLCF
51          61          71          81          91
QSFMDSGNRY FTSTWGGHHW ERNVINSAQI RRSHGGM SVL VTGAAGFVGS
101         111        121        131        141
HVS LALKKRG DGVVGI DNFN NYYPDPSL KKA RKNLLTQNSI FIVDGDINDS
151        161        171        181        191
KLLVKLEFDIA RETHVMHLAA QAGVRYAMEN PGSYIHSNIA GLVSLLEVCK
201        211        221        231        241
NSNPQP AIVW ASSSSVYGLN EKVPFSESDR TDQPASLYAA TKKAGEEITH
251        261        271        281        291
TYNHIYGLSI TGLRFFFTVYG PWGRPDMAYF SFTRNILQ GK PITVYRGKNR
301        311        321        331        341
VDLARDFTYI DDVVKGCIGS LDTSGKSTGS GGKKRGPAPY RIFNLGNTSP
351        361        371        381        391
VTVPMMVAML EKHLKVKAKK NFVVM PGNGD VPETHANISS ARKEFGYKPT
401        411        421
TDLQTGLKKE VKWYLSYYGY DQGKL
    
```

**Legend:**

The selection scale:

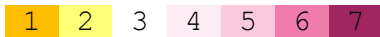

Positive selection

Purifying selection

## Selecton Results

```

1           11           21           31           41
MRGLEEEFIP STPGKFKDKT YYSGNRQFHR CFASTSTMFL WALFLLALTA
51          61          71          81          91
SYLSFQSFIN SGTRYLSSTW GSLHWEKQVR DSAQIHRVNG MSVLVTGAAG
101         111        121        131        141
FVGS HVSI AL KKRGDGVVGI DNFNNYDPS LKKARKDLLN LQNVYLIEGD
151        161        171        181        191
INDVHLISKL FDIVAETHVM HLA AQAGVRY AMENPKSYVH SNIAGLV TLL
201        211        221        231        241
EACKNANPQP AIVWASSSSV YGLNEKVPFS ESDRTDQPAS LYAATKKAGE
251        261        271        281        291
EITHTYNHIY GLSITGLREF TVYGPWGRPD MAYFSFTRNI LRGKPI TVYR
301        311        321        331        341
GKNRVDLARD FTYIDDIVKG CVGSLDTAGK STGSGGKKRG PAMFRIFNLG
351        361        371        381        391
NTSPVTVPMV VAMLEKHLKV KAKKHVLDMP GNGDVPFTHA NISLAQKELG
401        411        421        431
YKPTTNLQTG LGKEFVRWYLS YGYNQEKFI KD

```

### Legend:

The selection scale:

1 2 3 4 5 6 7

Positive selection

Purifying selection

## Selecton Results

1 11 21 31 41  
**MDKHRRWTYS** **ITKLVEWATI** **FAGAFLEFCF** **RSSPPSHSTT** **MKWGSSSNTF**  
 51 61 71 81 91  
**QWEKRVRLSA** **RSRSGHLSVL** **VTGAAGEFVGS** **HVSAALKRRG** **DGVVGLDNFN**  
 101 111 121 131 141  
**SYDPSLKRA** **RQKLLLEQKGV** **FVMEGDINDE** **KLLKKLFDIV** **EETHVMHLAA**  
 151 161 171 181 191  
**QAGVRYAMKN** **PGSYIHSNIA** **GLVTLFEACK** **SANPQPSIVW** **ASSSSVYGLN**  
 201 211 221 231 241  
**SKVPFSEKDQ** **TDQPASLYAA** **TKKAGEEIAH** **TYNHIYGLSI** **TGLRFFETVYG**  
 251 261 271 281 291  
**PWGRPDMAYF** **FFTKNILK GK** **PISVFQGSNN** **KSVARDEFTYI** **DDIVKGCCLGA**  
 301 311 321 331 341  
**LDTAEKSTGS** **GGK KKNNAQL** **RVFNLGNTSP** **VPVTKLVSIL** **EKLLKVKAKR**  
 351 361 371 381 391  
**NVLPLPTNGD** **VMFTHANISY** **AHKEFGYKPT** **TDLQTGLHKE** **VNWYLDYYSV**  
 401  
**SEKKIY**

### Legend:

The selection scale:

1 2 3 4 5 6 7

Positive selection

Purifying selection

## Selecton Results

```

1           11           21           31           41
MSQMMHIDNI PSTPGKFKME KSPYNRLRMH FSLAKLTFWS FVFLGLIFVF
51          61          71          81          91
FYRSPASSSP VSSDLSRRSL RTSSYGGPAW EKRIKASAKV RSRNGISVLV
101         111        121        131        141
TGAAGFVGTHTVSVALKRRGD GVLGLDNFND YYDPSLKRAR QALLERTGVY
151         161        171        181        191
VVEGDINDAT LLKKLEDIVP FTHVMHLAAQ AGVRYAMENP GSYVHSNIAG
201         211        221        231        241
LVNVLEICKS VNPQPAIVWA SSSSVYGLNT KVPFSEKDRT DQPASLYAAT
251         261        271        281        291
KKAGEEIAHT YNHIYGLSLT GLRFFTVYGP WGRPDMAYFF FTRDILKGS
301         311        321        331        341
IPIFEAANHGTVARDETYID DIVKGC LAAL DTAEKSTGSG GKKGAAQLR
351         361        371        381        391
VFNLGNTSPV PVSDLVGILE RLLKVKAKRL VMKLPRNGDV PFTHANISSA
401         411        421        431
HKELGKPTT DLQTGLKKEV RWYLNYYGNG KKSAQ

```

### Legend:

The selection scale:

1 2 3 4 5 6 7

Positive selection

Purifying selection

## Selecton Results

```

1           11           21           31           41
MSSMKHVDNI PSTPGKFKEK SHYNRLRLHF SVAKLTFWSF VFLGLIFICF
51          61          71          81          91
FKSTSSSSSP VSSDLSRRSL RTSSYDGP AW EKRIKASAKI RSTNGISVLV
101         111        121        131        141
TGAAGFVGT H VSSALKRRGD GVVGLDNFND YYDPSLKRAR QTLLESAGVY
151         161        171        181        191
IVEGDINDVA LLKKLEDIVQ FSHVMHLAAQ AGVRYAMENP SSVVHSNIAG
201         211        221        231        241
LVNLLFCKN ANPQPAIVWA SSSSVYGLNT KVPFSESDRT DQPASLYAAT
251         261        271        281        291
KKAGEEIAHT YNHIYGLSLT GLRFFTVYGP WGRPDMAYFF FTRDMLKGKS
301         311        321        331        341
ISIFEGADHG TVARDETYID DIVKGC LGAL DTAEKSTGSG GKKGPAQLR
351         361        371        381        391
VFNLGNTSPV PVSDLVTILE RLLKVKAKRA VMKLPRNGDV QFTHANISLA
401         411        421        431
QRELGYKPTT DLQTGLKKEV RWYLSY GEG KKSAQ

```

### Legend:

The selection scale:

1 2 3 4 5 6 7

Positive selection

Purifying selection

## Selecton Results

```

1           11           21           31           41
MTQLKPIILMH L D S I P S T P G K F K P D K S S P Y N L Y R L R F H P T L F P R F T L W S F F
51          61          71          81          91
F I F F I V L L I F F S S P S N P T A G N S R R S L K N S L S P S P A L G P N W E R R V R A S A R P
101         111        121        131        141
R S K T G F T V L V T G A A G F V G T H V S L G L K R R G D G V L G L D N F N Q Y Y D V G L K K A R
151        161        171        181        191
Q S L L E R S G I M V V K G D I N D A V L L R K L F D A V A F T H V M H M A A Q A G V R Y A M Q N P
201        211        221        231        241
G S Y V H S N I A G F V S L L E A C K M A N P Q P S I V W A S S S S V Y G L N S K V P F S E K D R T
251        261        271        281        291
D Q P A S L Y A A T K K A G E E I A H T Y N H I Y G L S I T G L R F F T V Y G P W G R P D M A Y F F
301        311        321        331        341
E T K D I L R G K E I K I F E T S D Q G S V A R D F T Y V D D V V K G C L G A L D T A K K S T G S G
351        361        371        381        391
G K K K G A A Q L R I F N L G N T K P V P V G R L V S I L E K L L K V K A K K K V I Q M P R N G D V
401        411        421        431        441
P F T H A N I T L A H T E L G Y K P T T D L E M G L K K E V K W Y V S Y Y G S K K K S S W

```

### Legend:

The selection scale:

1 2 3 4 5 6 7

Positive selection

Purifying selection

## Selecton Results

1 11 21 31 41  
 MKTIMASPPD TSKTTKLERY NSYIRRVNST KLIAASSKLL FRVTLLVALL  
 51 61 71 81 91  
 LIFFFTINYP PLTSEKSFNN NIHTTTHNLL SSAIYGGGAS WEKQVRHSST  
 101 111 121 131 141  
 PHRPNGLSVL VTGAAGFVGS HCSLALKKRG DGVLGLDNFN SYDPSLKRA  
 151 161 171 181 191  
 RQDQLSKHQI FIVEGDIINDT ELLKKLFDIV PFTHILHLAA QAGVRYAMQN  
 201 211 221 231 241  
 PLSYVNSNVA GFVNLLLEIAK AADPQPAIVW ASSSSVYGLN TKVPFSEDHR  
 251 261 271 281 291  
 TDQPASLYAA TKKAGEAIAH TYNHIYGLSL TGLRFFTVYG PWGRPDMAYE  
 301 311 321 331 341  
 FFTKDMIQ GK SINVYVTQDD KEVARDETYI DDIVKGCVGA LDTAEKSTGS  
 351 361 371 381 391  
 GGKKRGP AOL RVYNLGNTSP VSVKKLVAIL ENLLNLKAKK FFIKMPRNGD  
 401 411 421 431 441  
 VPFTHANVSL ALRDFGYKPT TDLSSGLRKF VKWYVSY YGI QSRVKKES EG  
 451  
 EK

### Legend:

The selection scale:

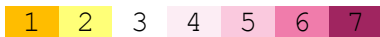

Positive selection

Purifying selection



## Selecton Results

```

1           11           21           31           41
MASLFSIDTK KSIKLD RNTY IHKVN SSKL IVAFIKLFYC IAILISALLI
51          61          71          81          91
GLFILNHILF ISTDS NQHGR RLFSF GGGAG WEKKVRHSSI PKKINGKVVL
101         111        121        131        141
VTGAAGFVGS HCGLA LKKRG DGVIG IDNEN SYDPSLKRA RQELMSKHEI
151        161        171        181        191
FIVDGDINDI DLVNK LFDIV RFTHV LHLAA QAGVRYAMEN PLSYVHSNVN
201        211        221        231        241
GFVNLLLEIAK SANPQ PAIVW ASSSS VYGLN TKVPF SENDR TDQPASLYAA
251        261        271        281        291
TKKAGEEIAH TYNHI YGLSL TGLRF FTVYG PWGRPD MAYF FFTKDMIQ GK
301        311        321        331        341
PIKVYVSDKE VARDF TYIDD VVKGC LGAID TAEKSTGSGG KKRGP AQLRV
351        361        371        381        391
YNLGN TSPVS VKKLV AILEN LLNIK AKKNL IRMPR NGDVP FTHANVSLAY
401        411        421        431
RDFGYKPTTN LSSGL RKFVK WYLSY YGIQA RIK

```

### Legend:

The selection scale:

1 2 3 4 5 6 7

Positive selection

Purifying selection

Figure S3 Selective pressure in promoter regions of *SIUGlcAE* genes

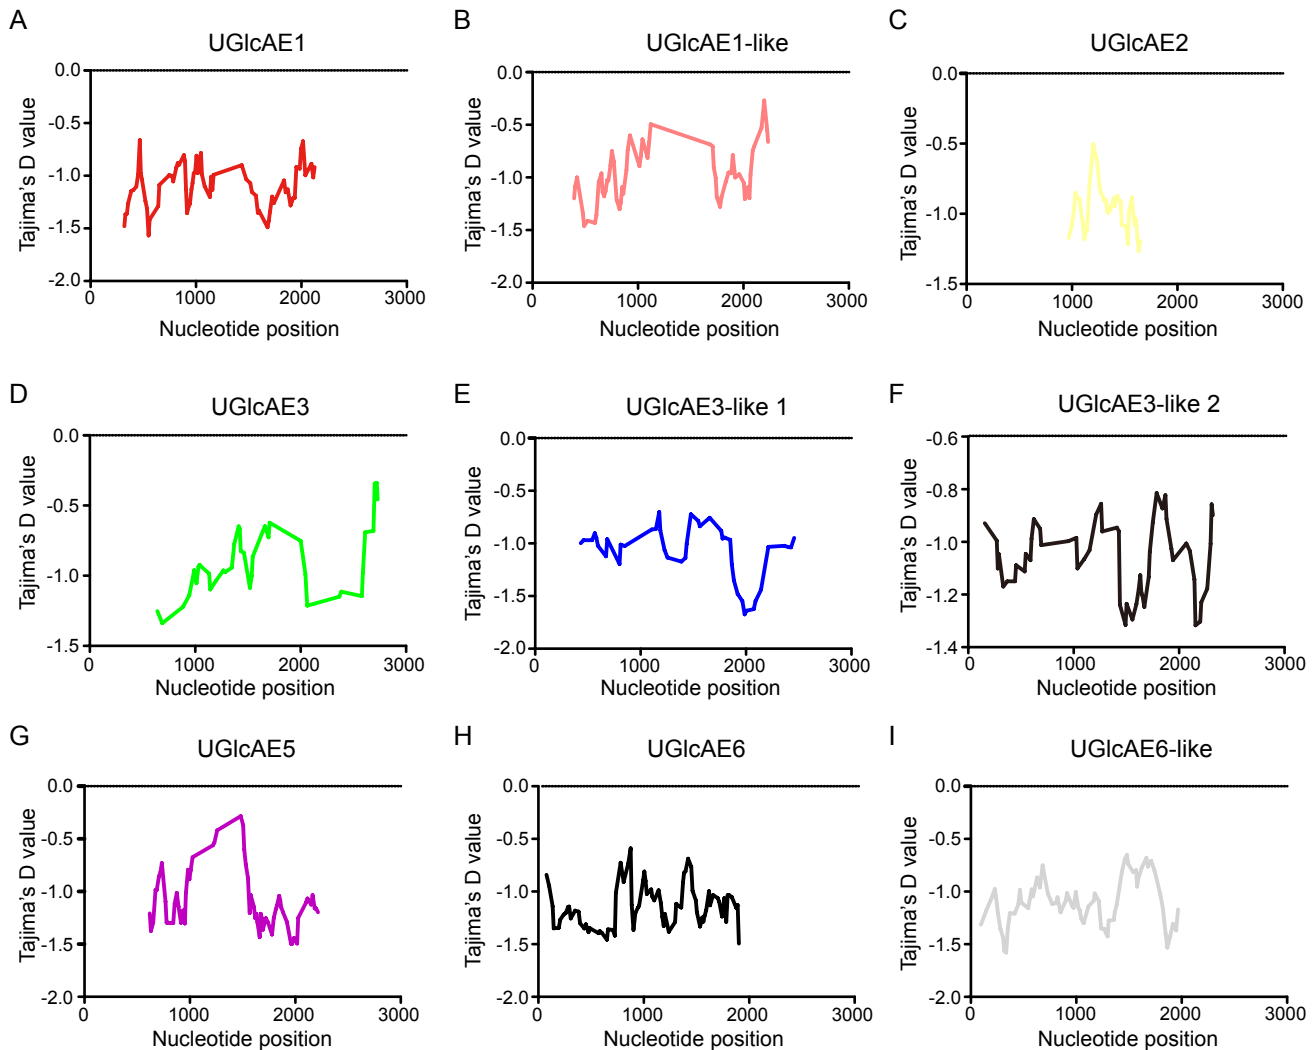

Supplement: ijms-19-01583-s001.pdf [file ijms-19-01583-s001.pdf]
